# Supplementary material for: Evaluation of Laminaria Digitata Hydrolysate for the Production of Bioethanol and Butanol by Fermentation
Source: MDPI journal article supplement (doi:10.3390/fermentation9010059), 2023-01-11
Supplement: s1 [file s1]

**Table S1.** Fermentation data on *L. digitata* hydrolysate by *C. acetobutylicum* ATCC 824 and *C. beijerinckii* strains NCIMB 8052 and DSM6423 on different conditions: raw hydrolysate (H), hydrolysate with addition of salts and nutrients (HSN), compared to fermentation on pure sugars mixtures containing mannitol (4 g/L) and glucose (22 g/L) (control), or only glucose (glucose only). Data from 6 days of cultivation. Data represent the average of two replicate experiments.

| <b>C.beijerinckii NCIMB8052</b> | <b>H</b> | <b>HSN</b> | <b>Control<br/>(pure sugars)</b> | <b>Glucose only</b> |
|---------------------------------|----------|------------|----------------------------------|---------------------|
| substrate initial (g/L)         |          |            |                                  |                     |
| D-Glucose                       | 9,58     | 9,49       | 22,11                            | 20,9                |
| Mannitol                        | 5,9      | 5,6        | 4,6                              |                     |
| Glucan                          | 10,67    | 10,44      |                                  |                     |
| Lactic acid                     | 1,2      | 1,2        |                                  |                     |
| Acetic acid                     |          | 2,25       | 2,28                             | 2,2                 |
| substrate consumed (g/L)        |          |            |                                  |                     |
| D-Glucose                       | 9,3      | 9,33       | 22,08                            | 20,9                |
| Mannitol                        | 0,14     | 3,82       | 1,52                             |                     |
| Glucan                          | 1,67     | 8,6        |                                  |                     |
| Lactic acid                     | 1,2      | 1,12       |                                  |                     |
| Acetic acid                     |          | 0,83       | 1,57                             | 1,3                 |
| Fermentation products (g/L)     |          |            |                                  |                     |
| Acetic acid                     |          |            |                                  |                     |
| Butyrate                        | 0,79     | 2,40       | 1,17                             | 0,70                |
| Isopropanol                     |          |            |                                  |                     |
| Ethanol                         | 0,08     | 0,15       | 0,15                             |                     |
| Butanol                         | 3,25     | 6,68       | 6,51                             | 5,50                |
| Acetone                         | 0,23     | 0,64       | 1,14                             | 1,40                |
| Total ABE products (g/L)        | 3,56     | 7,47       | 7,80                             | 6,90                |
| Butanol ratio in ABE (%)        | 91%      | 89%        | 83%                              | 80%                 |
| ABE yield total                 | 0,14     | 0,29       | 0,29                             | 0,33                |
| ABE yield partial               | 0,32     | 0,34       | 0,33                             | 0,33                |
| Sugar consumption (%)           | 42%      | 85%        | 88%                              | 100%                |

| <b>C. beijerinckii DSM6423</b> | <b>H</b> | <b>HSN</b> | <b>Control<br/>(pure sugars)</b> | <b>Glucose only<br/>(Diallo, Simons et al 2019)</b> |
|--------------------------------|----------|------------|----------------------------------|-----------------------------------------------------|
| substrate initial (g/L)        |          |            |                                  |                                                     |
| D-Glucose                      | 9,46     | 9,59       | 22,18                            | 40,47                                               |
| Mannitol                       | 5,8      | 5,82       | 4,37                             |                                                     |
| Glucan                         | 10,66    | 10,67      |                                  |                                                     |
| Lactic acid                    | 1,2      | 1,2        |                                  |                                                     |
| Acetic acid                    |          | 2,35       | 2,23                             | 2,37                                                |
| substrate consumed (g/L)       |          |            |                                  |                                                     |
| D-Glucose                      | 2,04     | 9,45       | 22,15                            | 38,75                                               |
| Mannitol                       | 0,22     | 1,9        | 0,43                             |                                                     |
| Glucan                         | 0,79     | 9,45       |                                  |                                                     |
| Lactic acid                    | 0,22     | 1,06       |                                  |                                                     |
| Acetic acid                    |          | 0,95       | 1,02                             | 1,84                                                |
| Fermentation products (g/L)    |          |            |                                  |                                                     |
| Acetic acid                    |          |            |                                  |                                                     |
| Butyrate                       | 1,09     | 3,61       | 1,05                             | 0,19                                                |
| Isopropanol                    |          | 0,56       | 1,34                             | 4,12                                                |
| Ethanol                        |          | 0,14       | 0,20                             | 0                                                   |
| Butanol                        | 0,05     | 5,41       | 5,83                             | 8,29                                                |
| Acetone                        |          |            | 0,07                             |                                                     |
| Total I/ABE products (g/L)     | 0,05     | 6,11       | 7,44                             | 12,41                                               |
| Butanol ratio in I/ABE (%)     | 100%     | 89%        | 78%                              | 67%                                                 |
| I/ABE yield total              | 0,00     | 0,23       | 0,28                             | 0,31                                                |
| I/ABE yield partial            | 0,02     | 0,29       | 0,33                             | 0,32                                                |
| Sugar consumption (%)          | 12%      | 80%        | 85%                              | 96%                                                 |

| <b>C. acetobutylicum ATCC 824</b> | <b>H</b> | <b>HSN</b> | <b>Control<br/>(pure sugars)</b> | <b>Glucose only</b> |
|-----------------------------------|----------|------------|----------------------------------|---------------------|
| substrate initial (g/L)           |          |            |                                  |                     |
| D-Glucose                         | 9,66     | 9,95       | 21,87                            | 21,2                |
| Mannitol                          | 5,15     | 6,08       | 5,3                              |                     |
| Glucan                            | 11,6     | 11,6       |                                  |                     |
| Lactic acid                       | 1,2      | 1,2        |                                  |                     |
| Acetic acid                       | 2,29     | 2,36       | 2,22                             | 2,2                 |
| substrate consumed (g/L)          |          |            |                                  |                     |
| D-Glucose                         | 9,5      | 9,83       | 21,84                            | 21,2                |
| Mannitol                          | 3,9      | 3,88       | 4,05                             |                     |
| Glucan                            | 11,4     | 11,3       |                                  |                     |
| Lactic acid                       | 1,2      | 1,16       |                                  |                     |
| Acetic acid                       |          |            |                                  |                     |
| Fermentation products (g/L)       |          |            |                                  |                     |
| Acetic acid                       | 3,04     | 3,42       | 2,21                             | 0,10                |
| Butyrate                          | 2,99     | 2,73       | 1,99                             | 1,90                |
| Isopropanol                       |          |            |                                  |                     |
| Ethanol                           | 0,43     | 0,41       | 0,40                             | 0,50                |
| Butanol                           | 4,21     | 4,59       | 4,16                             | 3,15                |
| Acetone                           | 0,85     | 0,80       | 1,49                             | 1,20                |
| Total ABE products (g/L)          | 5,49     | 5,80       | 6,05                             | 4,85                |
| Butanol ratio in ABE (%)          | 77%      | 79%        | 69%                              | 65%                 |
| ABE yield total                   | 0,21     | 0,21       | 0,22                             | 0,23                |
| ABE yield partial                 | 0,22     | 0,23       | 0,23                             | 0,23                |
| Sugar consumption (%)             | 94%      | 91%        | 95%                              | 100%                |
